# Supplementary material
Source: PubMed Central journal article supplement (PMC3384438)

Supplemental Figure 1.

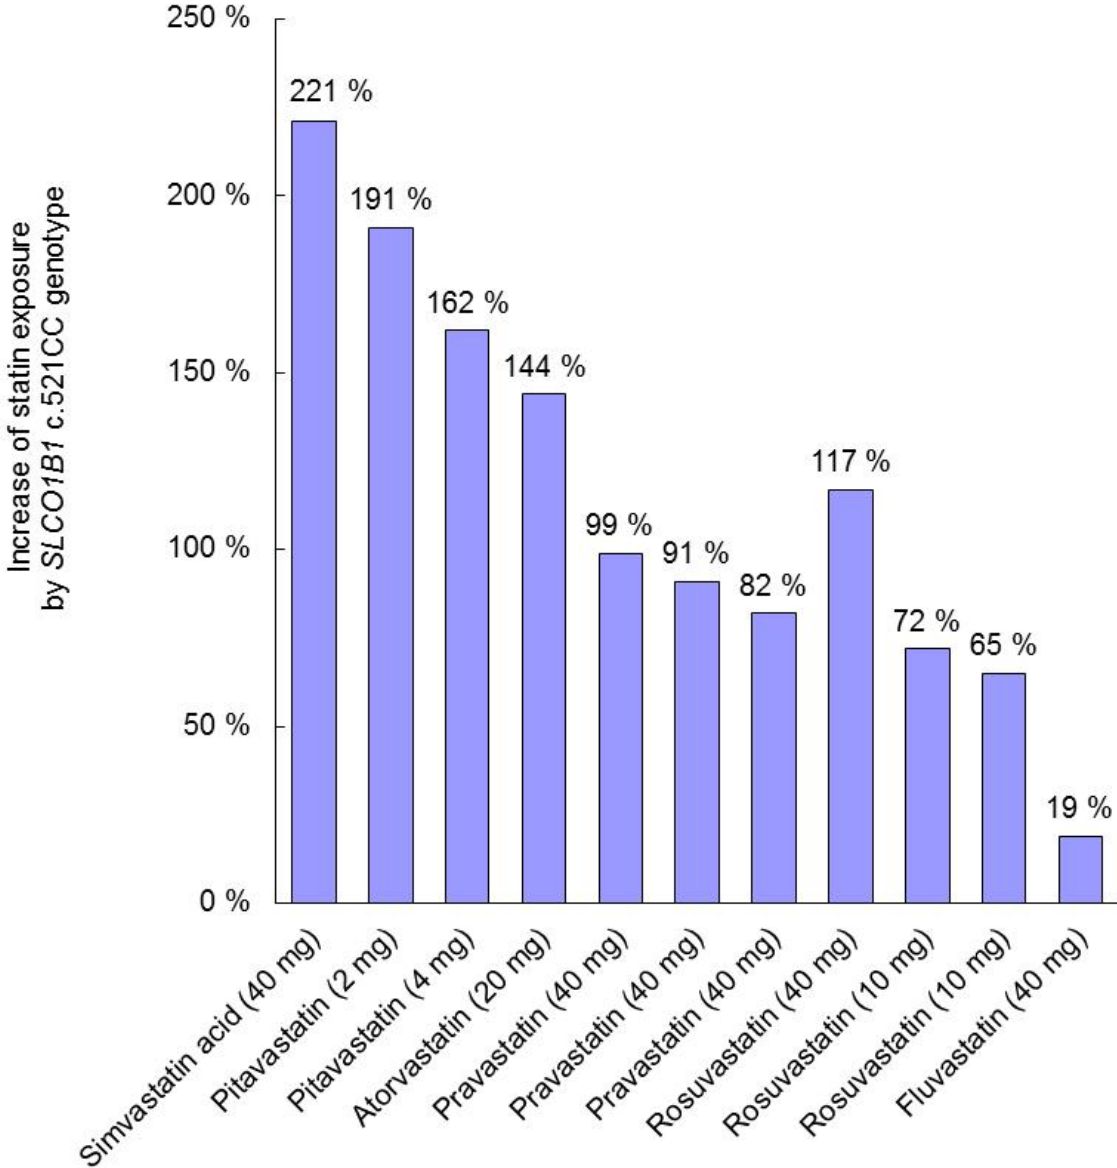

Supplement: clpt201257x6.pdf [file clpt201257x6.pdf]
